# Cryptogein-Induced Initial Events in Tobacco BY-2 Cells: Pharmacological Characterization of Molecular Relationship among Cytosolic Ca<sup>2+</sup> Transients, Anion Efflux and Production of Reactive Oxygen Species

Yasuhiro Kadota<sup>1</sup>, Tatsuaki Goh<sup>1</sup>, Hajime Tomatsu<sup>1</sup>, Ryosuke Tamauchi<sup>1</sup>, Katsumi Higashi<sup>2</sup>, Shoshi Muto<sup>3,\*</sup> and Kazuyuki Kuchitsu<sup>1,2,4</sup>

<sup>1</sup> Department of Applied Biological Science, Tokyo University of Science, 2641 Yamazaki, Noda, Chiba, 278-8510 Japan

<sup>2</sup> Genome & Drug Research Center, Tokyo University of Science, 2641 Yamazaki, Noda, Chiba, 278-8510 Japan

<sup>3</sup> Graduate School of Bioagricultural Sciences and Nagoya University Bioscience Center, Nagoya University, Chikusa-ku, Nagoya, 464-8610 Japan

**Ion fluxes and the production of reactive oxygen species (ROS) are early events that follow elicitor treatment or microbial infection. However, molecular mechanisms for these responses as well as their relationship have been controversial and still largely unknown. We here simultaneously monitored the temporal sequence of initial events at the plasma membrane in suspension-cultured tobacco cells (cell line BY-2) in response to a purified proteinaceous elicitor, cryptogein, which induced hypersensitive cell death. The elicitor induced transient rise in cytosolic Ca<sup>2+</sup> concentration ([Ca<sup>2+</sup>]<sub>cyt</sub>) showing two distinct peaks, followed by biphasic (rapid/transient and slow/prolonged) Cl<sup>-</sup> efflux and H<sup>+</sup> influx. Pharmacological analyses suggested that the two phases of the [Ca<sup>2+</sup>]<sub>cyt</sub> response correspond to Ca<sup>2+</sup> influx through the plasma membrane and an inositol 1,4,5-trisphosphate-mediated release of Ca<sup>2+</sup> from intracellular Ca<sup>2+</sup> stores, respectively, and the [Ca<sup>2+</sup>]<sub>cyt</sub> transients and the Cl<sup>-</sup> efflux were mutually dependent events regulated by protein phosphorylation. The elicitor also induced production of ROS including O<sub>2</sub><sup>-</sup> and H<sub>2</sub>O<sub>2</sub>, which initiated after the [Ca<sup>2+</sup>]<sub>cyt</sub> rise and required Ca<sup>2+</sup> influx, Cl<sup>-</sup> efflux and protein phosphorylation. An inhibitor of NADPH oxidase, diphenylene iodonium, completely inhibited the elicitor-induced production of O<sub>2</sub><sup>-</sup> and H<sub>2</sub>O<sub>2</sub>, but did not affect the [Ca<sup>2+</sup>]<sub>cyt</sub> transients. These results suggest that cryptogein-induced plasma membrane Ca<sup>2+</sup> influx is independent of ROS, and NADPH oxidase dependent ROS production is regulated by these series of ion fluxes.**

**Keywords:** Calcium ion — Cryptogein — Elicitor — Ion flux — Reactive oxygen species — Suspension-cultured tobacco BY-2 cells.

Abbreviations: BAPTA, 1,2-bis-(2-aminophenoxy)ethane-*N,N,N',N'*-tetraacetic acid; [Ca<sup>2+</sup>]<sub>cyt</sub>, cytosolic free Ca<sup>2+</sup> concentration; [Cl<sup>-</sup>], Cl<sup>-</sup> concentration; DIDS, 4,4'-diisothiocyanostilbene-2,2'-disulfonate; DPI, diphenylene iodonium; IP<sub>3</sub>, inositol 1,4,5-trisphosphate; MCLA, 2-methyl-6-[*p*-methoxyphenyl]-3,7-dihydroimidazo[1,2-*a*]pyrazin-3-one; MTT, 3-(4,5-dimethyl-2-thiazolyl)-2,5-diphenyl-2H tetrazolium bromide; NPPB, 5-nitro-2-(3-phenylpropylamino)benzoic acid; O<sub>2</sub><sup>-</sup>, superoxide anion; ROS, reactive oxygen species.

\*The authors would like to dedicate this article to the memory of Dr. Muto, who died on 23 January 2004.

## Introduction

Plants respond to attacks from pathogens by activating a variety of defense mechanisms, including the synthesis of phytoalexins and hypersensitive cell death, which restricts growth of pathogens at the site of infection (Jones and Dangl 1996). These responses require recognition between the host and pathogen mediated by signaling molecules called elicitors derived from pathogens or plants and their specific receptors (Shibuya et al. 1993, Heath 2000).

Upon recognition of pathogenic signals, plant cells initiate activation of a complexed signal transduction network that release second messengers and trigger inducible defense responses. Characteristic early events include an influx of Ca<sup>2+</sup> and H<sup>+</sup>, Cl<sup>-</sup> efflux, membrane depolarization and production of reactive oxygen species (ROS) (Kuchitsu et al. 1993, Kuchitsu et al. 1995, Kuchitsu et al. 1997, Levine et al. 1994, Kikuyama et al. 1997, Jabs et al. 1997, Pugin et al. 1997, Blume et al. 2000). These initial responses are followed by the production of phytoalexins, transcriptional activation of defense genes and hypersensitive cell death. These downstream events are inhibited by some blockers for Ca<sup>2+</sup> channels (Ebel et al. 1995, Tavernier et al. 1995, Binet et al. 2001, Lecourieux et al. 2002) and anion channels (Ebel et al. 1995, Levine et al. 1996, Jabs et al. 1997, Wendehenne et al. 2002), suggesting that the initial ion fluxes are crucial for the induction of defense responses.

Since individual initial events have been analyzed independently, however, the relationship among various responses is still largely unknown. In addition, the characteristics of initial events have been reported differently in different systems. Particularly the relationship between elicitor-induced changes in cytosolic Ca<sup>2+</sup> concentrations ([Ca<sup>2+</sup>]<sub>cyt</sub>) and ROS production has been controversial. Mithöfer et al. (2001) argued that β-glucan-induced H<sub>2</sub>O<sub>2</sub> synthesis in soybean is independent of [Ca<sup>2+</sup>]<sub>cyt</sub> changes. By contrast, Chandra et al. (1997) showed

<sup>4</sup> Corresponding author: E-mail, kuchitsu@rs.noda.tus.ac.jp; Fax, +81-4-7123-9767.

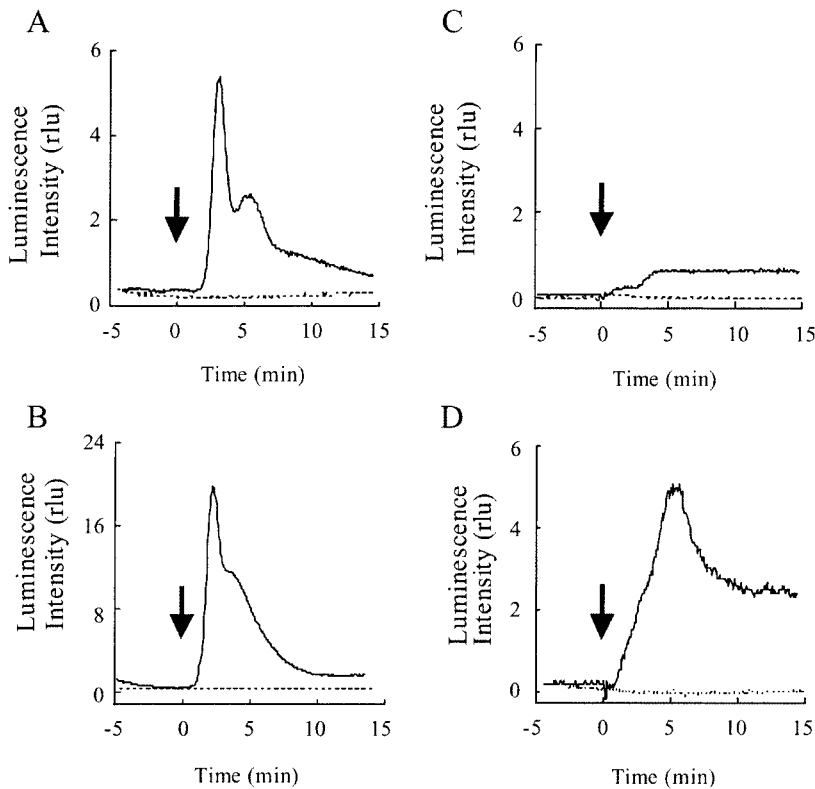

**Fig. 1** Apoaquorin-expressing cells exhibit different  $[Ca^{2+}]_{\text{cyt}}$  responses to cryptogeiin in different culture conditions.  $[Ca^{2+}]_{\text{cyt}}$ -dependent luminescence of reconstituted aequorin was monitored in tobacco cells treated with cryptogeiin (500 nM, solid lines) or DW (broken lines). (A) Apoaquorin-expressing BY-2 cells cultured in normal growth medium were incubated with 1  $\mu\text{M}$  coelenterazine for 6 h.  $[Ca^{2+}]_{\text{cyt}}$  responses to cryptogeiin or DW application (arrows) were measured during shaking of the samples. Data are from one representative of 15 experiments. (B) Apoaquorin-expressing BY-2 cells were transferred to a suspension buffer containing 175 mM mannitol, 0.5 mM  $\text{CaCl}_2$ , 0.5 mM  $\text{K}_2\text{SO}_4$ , and 2 mM HEPES-HCl (pH 5.75) and incubated with 1  $\mu\text{M}$  coelenterazine for 6 h. Cryptogeiin-induced  $[Ca^{2+}]_{\text{cyt}}$  changes were measured without shaking. Data are from one representative of three experiments. (C) Apoaquorin-expressing BY-2 cells cultured in the normal growth medium were incubated with 1  $\mu\text{M}$  coelenterazine for 6 h. Cryptogeiin-induced  $[Ca^{2+}]_{\text{cyt}}$  changes were measured without shaking. Data are from one representative of three experiments. (D) Apoaquorin-expressing BY-2 cells were transferred to the suspension buffer and incubated with 1  $\mu\text{M}$  coelenterazine for 6 h. Cryptogeiin-induced  $[Ca^{2+}]_{\text{cyt}}$  changes were measured without shaking. Data are from one representative of three experiments.

that a change in  $[Ca^{2+}]_{\text{cyt}}$  is essential for the initiation of oligogalacturonide-induced ROS production in tobacco cells. Cessna and Low (2001) reported that fungal elicitor-induced oxidative burst depends on the release of  $\text{Ca}^{2+}$  from intracellular stores and is independent of the influx of extracellular  $\text{Ca}^{2+}$ . Furthermore, application of  $\text{H}_2\text{O}_2$  induces  $[Ca^{2+}]_{\text{cyt}}$  changes (Price et al. 1994, Levine et al. 1996, Takahashi et al. 1998, Kawano and Muto 2000) and  $\text{H}_2\text{O}_2$  is suggested to play an important role in  $[Ca^{2+}]_{\text{cyt}}$  rise in abscisic acid (ABA) signaling in guard cells (Pei et al. 2000, Kwak et al. 2003). Lecourieux et al. (2002) suggested that ROS might also affect  $[Ca^{2+}]_{\text{cyt}}$  in elicitor signaling.

To elucidate the relationship among these various initial responses, it is important to simultaneously monitor and compare the responses under the same conditions. In the present study, we concomitantly analyzed various initial events including plasma membrane ion fluxes and ROS production, to compare the temporal sequence of these events. We also applied pharmacological manipulations to elucidate their underlying mechanisms.

A 10-kDa proteinaceous elicitor, cryptogeiin, produced by a pathogenic fungus *Phytophthora cryptogea* induces hypersensitive response in planta as well as in cell suspensions of tobacco (Ricci et al. 1989, Binet et al. 2001).  $\text{Ca}^{2+}$  and anion channel inhibitors inhibit cryptogeiin-induced cell death in *Nicotiana tabacum* cv. Xanthi cells, suggesting that cryptogeiin induced the cell death via a specific signal transduction pathway of the cells (Binet et al. 2001, Lecourieux et al. 2002).

Tobacco BY-2 cell line has been used as one of the ideal model plant cells for cell and molecular biological research (Nagata et al. 1992). We have analyzed cryptogeiin-induced cell death in BY-2 cells as a model system for hypersensitive cell death. We here show that the elicitor induced an influx of extracellular  $\text{Ca}^{2+}$ , followed by inositol 1,4,5-trisphosphate ( $\text{IP}_3$ )-mediated  $\text{Ca}^{2+}$  release from intracellular stores. The  $\text{Ca}^{2+}$  influx and  $\text{Cl}^-$  efflux are mutually dependent and both responses are regulated by protein phosphorylation. The elicitor-induced ROS production was shown not to be involved in the induction of  $[Ca^{2+}]_{\text{cyt}}$  rise but to be induced downstream of  $\text{Ca}^{2+}$  influx,  $\text{Cl}^-$  efflux and protein phosphorylation.

## Results

### *Cryptogeiin induced transient cytosolic $\text{Ca}^{2+}$ rise showing two distinct peaks*

A proteinaceous elicitor cryptogeiin induced cell death in suspension-cultured tobacco BY-2 cells. Evans blue assay (Turner and Novacky 1974) showed that in the cell suspension 3 d after subculture cell death was induced 10–15 h after the application of cryptogeiin (500 nM, data not shown). To analyze various ion fluxes in defense signaling, we applied apoaquorin-expressing BY-2 cells to monitor cryptogeiin-induced changes in  $[Ca^{2+}]_{\text{cyt}}$ . Cryptogeiin also caused cell death in apoaquorin-expressing cell cultures that was indistinguishable from the non-transformed control. After incubation of the cells with coelenterazine for 6 h in the normal growth medium

to reconstruct aequorin, chemiluminescence was monitored with a luminometer while the cell suspension was continuously shaken for aeration. Cryptogein induced characteristic two transient peaks in aequorin luminescence reflecting  $[Ca^{2+}]_{cyt}$  increase (Fig. 1A). After an apparent lag of  $64 \pm 4$  s (SE,  $n = 15$ ), the elicitor caused a rapid increase in  $[Ca^{2+}]_{cyt}$  (first response peak), which reached a maximum level at  $137 \pm 5$  s of treatment. Thereafter,  $[Ca^{2+}]_{cyt}$  decreased until the second rise in  $[Ca^{2+}]_{cyt}$  (second response peak) occurred, which reached maximum at  $362 \pm 16$  s. Subsequent to this,  $[Ca^{2+}]_{cyt}$  decreased gradually to the basal (pre-treatment) levels.

#### Effects of nutrition and aeration on $[Ca^{2+}]_{cyt}$ responses

The temporal pattern of changes in  $[Ca^{2+}]_{cyt}$  was greatly affected by the culture conditions, especially by nutrition and the degree of aeration. When the extracellular growth medium was replaced by a suspension buffer containing 175 mM mannitol, 0.5 mM  $CaCl_2$ , 0.5 mM  $K_2SO_4$ , and 2 mM HEPES-HCl (pH 5.75), incubated with coelenterazine for 6 h and luminescence was measured with shaking, the cryptogein-induced  $[Ca^{2+}]_{cyt}$  response showed 4-fold larger than that measured in the growth medium (Fig. 1B). After an apparent lag of  $71 \pm 3$  s ( $n = 3$ ), cryptogein caused a rapid increase in  $[Ca^{2+}]_{cyt}$ , which reached a maximum level at  $173 \pm 7$  s of treatment. This peak appeared the composite of the two phases of the  $[Ca^{2+}]_{cyt}$  change.

When the cells were kept in the growth medium and luminescence was measured without shaking, cryptogein-induced  $[Ca^{2+}]_{cyt}$  changes became smaller (Fig. 1C). The  $[Ca^{2+}]_{cyt}$  changes also became smaller in the cells kept in the above buffer solution and measured without shaking (Fig. 1D). This  $[Ca^{2+}]_{cyt}$  changes were characterized by a rapid and transient increase which occurred after a lag of  $56 \pm 15$  s peaked at  $255 \pm 50$  s ( $n = 3$ ), followed by a decline to an elevated level that was sustained. These results indicate that the elicitor-induced  $Ca^{2+}$  responses are affected depending on the conditions of nutrition and aeration. Since the conditions used in Fig. 1A reflect the physiological status of the regular culture conditions, we carried out the following experiments in the growth medium with shaking except otherwise stated.

#### Plasma membrane fluxes of $H^+$ and $Cl^-$ , and ROS production

Extracellular pH and  $Cl^-$  concentration ( $[Cl^-]$ ) were simultaneously monitored with ion-selective electrodes in the growth medium with shaking as shown in Fig. 1A (Fig. 2A). After  $116 \pm 5$  s ( $n = 6$ ) lag following the application of cryptogein, the pH of the extracellular medium exhibited a biphasic change, namely a rapid and transient increase peaked at  $488 \pm 19$  s, followed by a slow and prolonged period of alkalization. Extracellular  $[Cl^-]$  also showed a biphasic increase after a lag of  $120 \pm 6$  s ( $n = 9$ ), but the rapid transient peak was not apparent.

Production of superoxide anion ( $\cdot O_2^-$ ) and  $H_2O_2$  were monitored with chemiluminescence assays using 2-methyl-6-

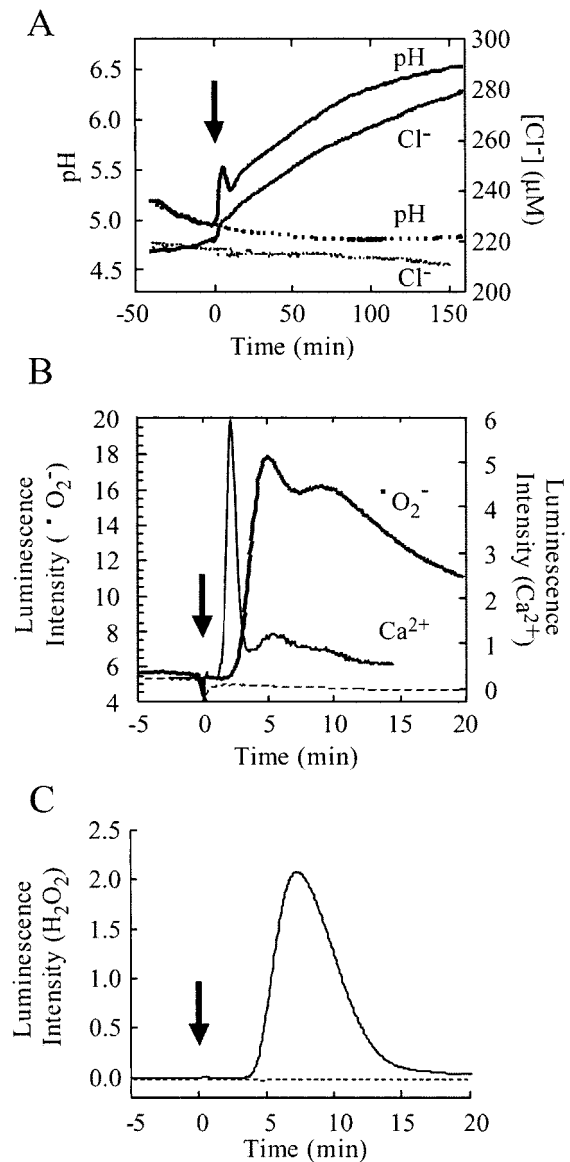

**Fig. 2** Cryptogein-induced changes in pH,  $[Cl^-]$  and ROS ( $\cdot O_2^-$  and  $H_2O_2$ ) production. BY-2 cells were treated with cryptogein (500 nM, solid line) or DW (broken line). (A) Extracellular pH and  $[Cl^-]$  were monitored simultaneously. Data are from one representative of 6 experiments. (B)  $\cdot O_2^-$  production in apoaequorin-expressing cells measured by MCLA luminescence. The cryptogein-induced  $[Ca^{2+}]_{cyt}$  changes in the same culture are also indicated. Data are from one representative of seven experiments. (C)  $H_2O_2$  production in apoaequorin-expressing cells measured by luminol luminescence. The arrows correspond to cryptogein application. Data are from one representative of seven experiments.

[*p*-methoxyphenyl]-3,7-dihydroimidazo[1,2-*a*]pyrazin-3-one (MCLA) (Uehara et al. 1993) and luminol, respectively (Fig. 2B, C). Due to the pH-dependency of luminol chemiluminescence, the luminol assay for  $H_2O_2$  was carried out after replacing the growth medium with a buffer solution (pH 7.0) and adding 5 mM K-phosphate buffer (pH 7.0, see Materials and

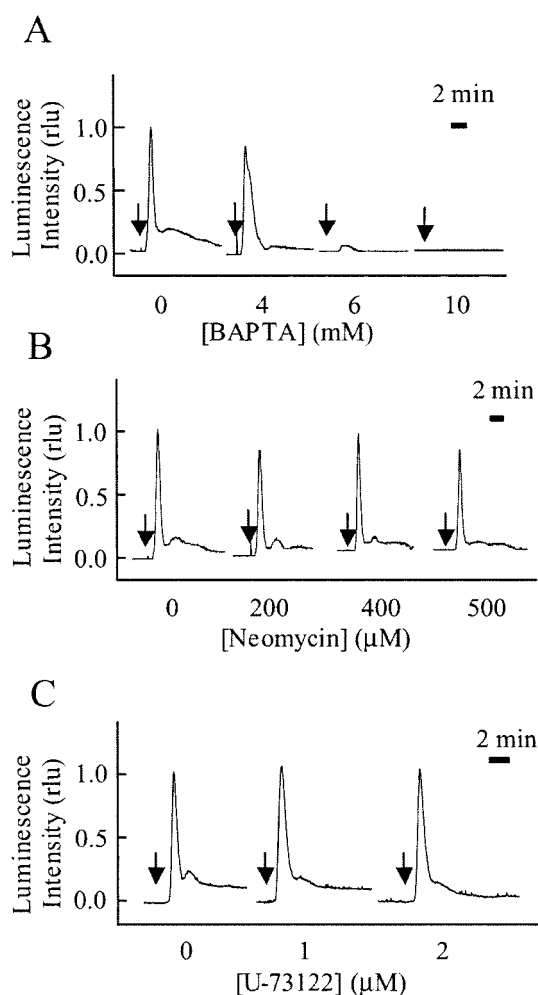

**Fig. 3** The two peaks in  $[Ca^{2+}]_{\text{cyt}}$  consist of extracellular  $Ca^{2+}$  influx and subsequent  $IP_3$ -mediated  $Ca^{2+}$  release from intracellular  $Ca^{2+}$  stores. Effect of the  $Ca^{2+}$  chelator, BAPTA (A) and the phospholipase C inhibitors, neomycin (B) and U73122 (C) on cryptogei-induced  $[Ca^{2+}]_{\text{cyt}}$  responses (relative luminescence). Each inhibitor was applied 15 min before the application of cryptogei (arrows). The maximum luminescence value of the control cells was expressed as 1.0. Data are from one representative experiment of five.

Methods). Cryptogei induced a biphasic transient  $^{\circ}O_2^-$  production after a lag of  $124 \pm 6$  s ( $n = 7$ ) (Fig. 2B), which was clearly after the increase in  $[Ca^{2+}]_{\text{cyt}}$  in the same culture under the same conditions.  $H_2O_2$  production occurred later ( $268 \pm 14$  s ( $n = 7$ )) after cryptogei application; peaked at  $594 \pm 41$  s) and subsequently decreased to the basal levels (Fig. 2C).

In summary, concomitant analyses revealed the following time sequence of the initial events after cryptogei application:  $[Ca^{2+}]_{\text{cyt}}$  change starts at  $64 \pm 4$  s ( $n = 15$ ), changes of extracellular pH and  $[Cl^-]$  at  $116 \pm 5$  s ( $n = 6$ ) and  $120 \pm 6$  s ( $n = 9$ ), respectively then  $^{\circ}O_2^-$  production at  $124 \pm 6$  s ( $n = 7$ ) and  $H_2O_2$  production at  $268 \pm 14$  s ( $n = 7$ ).

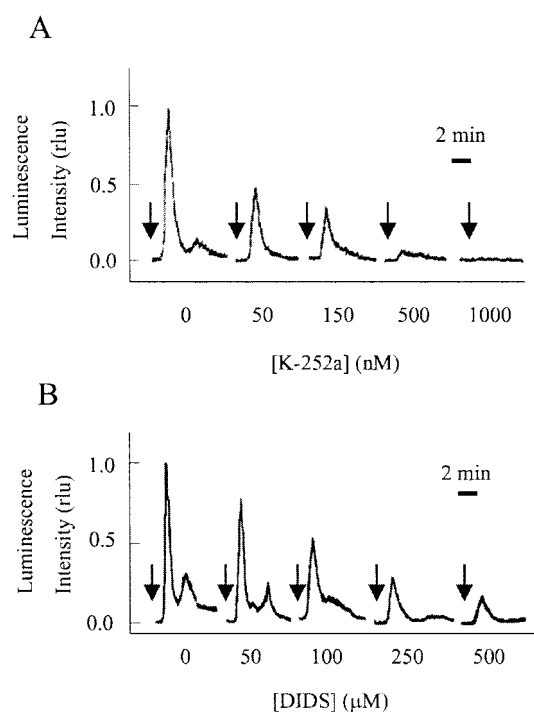

**Fig. 4** The  $[Ca^{2+}]_{\text{cyt}}$  transients may be regulated by protein phosphorylation and  $Cl^-$  efflux. Effects of the protein kinase inhibitor, K-252a (A), and the  $Cl^-$  channel blocker, DIDS (B) on cryptogei-induced  $[Ca^{2+}]_{\text{cyt}}$  responses (relative luminescence). Each inhibitor was applied 15 min before the application of cryptogei (arrows). The maximum luminescence value of the control cells was expressed as 1.0. Data are from one representative experiment of five.

#### Origins of $Ca^{2+}$ for the two distinct $Ca^{2+}$ transients

To elucidate the molecular mechanisms underlying the elicitor-induced changes in  $[Ca^{2+}]_{\text{cyt}}$ , we tested the effects of various pharmacological reagents. To prevent the side effects of the inhibitors, cytotoxicity of all inhibitors was tested using 3-(4,5-dimethyl-2-thiazolyl)-2,5-diphenyl-2H tetrazolium bromide (MTT) and Evans blue (Campling et al. 1988). Only those showed no cytotoxicity was applied for further experiments (data not shown).

A  $Ca^{2+}$  chelator, 1,2-bis-(2-aminophenoxy) ethane- $N,N,N',N'$ -tetraacetic acid (BAPTA), inhibited both peaks of the  $[Ca^{2+}]_{\text{cyt}}$  transients (Fig. 3A), suggesting that increases in  $[Ca^{2+}]_{\text{cyt}}$  are due to the influx of extracellular  $Ca^{2+}$ . Phospholipase C, an enzyme producing  $IP_3$ , is inhibited by neomycin and U-73122 (Zhang et al. 2002). Neither of these inhibitors affected the first peak of the  $[Ca^{2+}]_{\text{cyt}}$  transients, while both inhibited the second peak (Fig. 3B, C), suggesting that the second peak in the  $[Ca^{2+}]_{\text{cyt}}$  response is due to the release of  $Ca^{2+}$  from intracellular  $Ca^{2+}$  stores via  $IP_3$ -dependent pathway. Application of BAPTA during the second peak caused decrease in aequorin chemiluminescence (data not shown), suggesting that  $IP_3$ -dependent  $Ca^{2+}$  release from intracellular stores might require a continuous influx of extracellular  $Ca^{2+}$ .

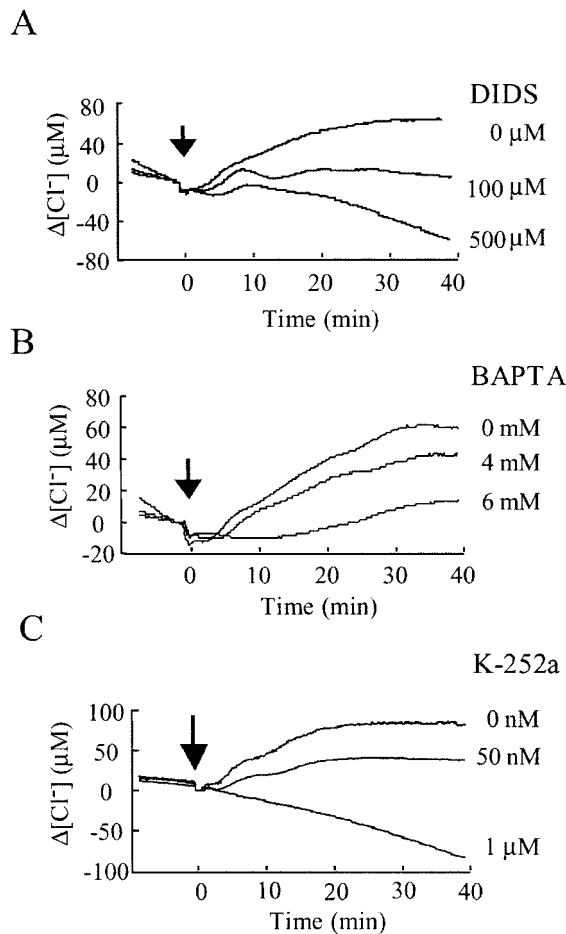

**Fig. 5** Efflux of  $\text{Cl}^-$  is inhibited by DIDS and regulated by protein phosphorylation and  $\text{Ca}^{2+}$  influx. Effect of DIDS (A), BAPTA (B) and K-252 (C) on the cryptogein-induced  $\text{Cl}^-$  efflux (relative luminescence). Each inhibitor was applied 15 min before the application of cryptogein (arrows). Data are from one representative experiment of three.

#### Roles of protein phosphorylation and anion efflux on $[\text{Ca}^{2+}]_{\text{cyt}}$ responses

A protein kinase inhibitor, K-252a, inhibited both of the  $[\text{Ca}^{2+}]_{\text{cyt}}$  response peaks in a dose-dependent manner and completely abolished the both peaks at 1  $\mu\text{M}$ , suggesting that protein phosphorylation is crucial for the cryptogein-induced  $[\text{Ca}^{2+}]_{\text{cyt}}$  response (Fig. 4A).

To examine the relationship between the increase in  $[\text{Ca}^{2+}]_{\text{cyt}}$  and  $\text{Cl}^-$  efflux, we tested the effects of various anion channel blockers. Niflumic acid and 5-nitro-2-(3-phenylpropylamino) benzoic acid (NPPB) induced extracellular alkalization and showed cytotoxicity (data not shown), whereas 4,4'-diisothiocyanostilbene-2,2'-disulfonate (DIDS) had no cytotoxic effects at least up to 15 h (data not shown). DIDS inhibited  $[\text{Ca}^{2+}]_{\text{cyt}}$  responses in a concentration-dependent manner (Fig. 4B), suggesting that an efflux of anions is crucial for the induction of the  $[\text{Ca}^{2+}]_{\text{cyt}}$  response. However, in contrast to

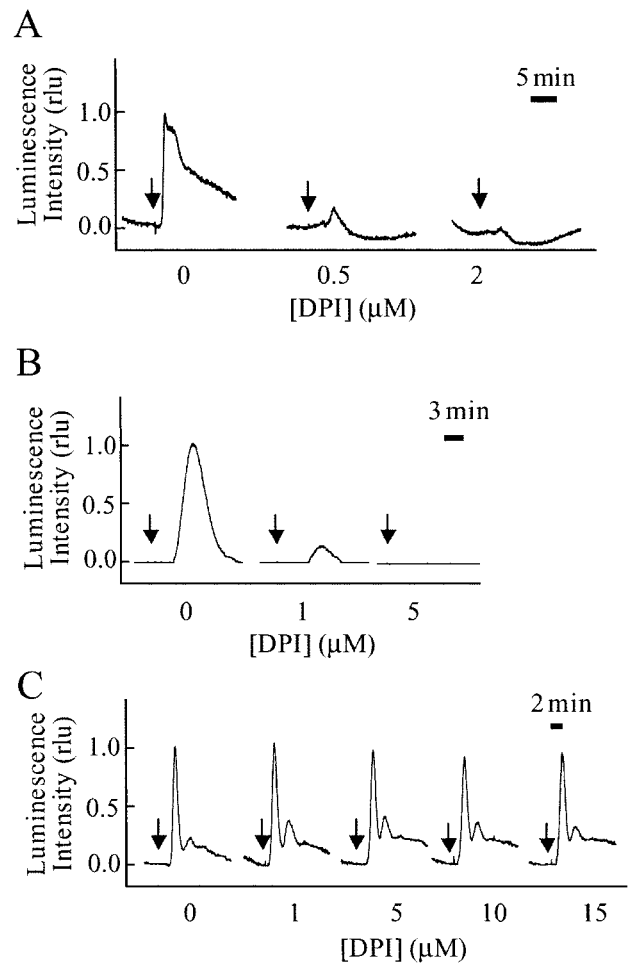

**Fig. 6** The relationship between ROS ( $^{\bullet}\text{O}_2^-$  and  $\text{H}_2\text{O}_2$ ) production and changes in  $[\text{Ca}^{2+}]_{\text{cyt}}$ . DPI, an inhibitor of NADPH oxidase, was applied to apoaequorin-expressing BY-2 cells and the effect on cryptogein-induced  $^{\bullet}\text{O}_2^-$  production (A),  $\text{H}_2\text{O}_2$  production (B) and  $[\text{Ca}^{2+}]_{\text{cyt}}$  responses (C) was analyzed. Each inhibitor was applied 15 min before the application of cryptogein (arrows). The maximum luminescence value of the control cells was expressed as 1.0. Data are from one representative experiment of four.

the inhibitory effect of K-252a, the inhibition by DIDS was always incomplete, even at concentrations high enough to cause cytotoxicity (1.5 mM, data not shown).

#### Cryptogein-induced changes in $[\text{Ca}^{2+}]_{\text{cyt}}$ and efflux of $\text{Cl}^-$ are interdependent

Inhibition of  $[\text{Ca}^{2+}]_{\text{cyt}}$  responses by DIDS suggested that anion efflux is important in  $\text{Ca}^{2+}$  signaling. Indeed, the cryptogein-induced  $\text{Cl}^-$  efflux was inhibited both by DIDS (Fig. 5A) and BAPTA (Fig. 5B), suggesting that the  $\text{Cl}^-$  efflux requires an influx of extracellular  $\text{Ca}^{2+}$  through the plasma membrane. Thus the elicitor-induced increase in  $[\text{Ca}^{2+}]_{\text{cyt}}$  and the  $\text{Cl}^-$  efflux appear to be interdependent. The finding that K-252a inhibited changes both in  $[\text{Ca}^{2+}]_{\text{cyt}}$  and  $[\text{Cl}^-]$  (Fig. 4A, 5C) suggests that

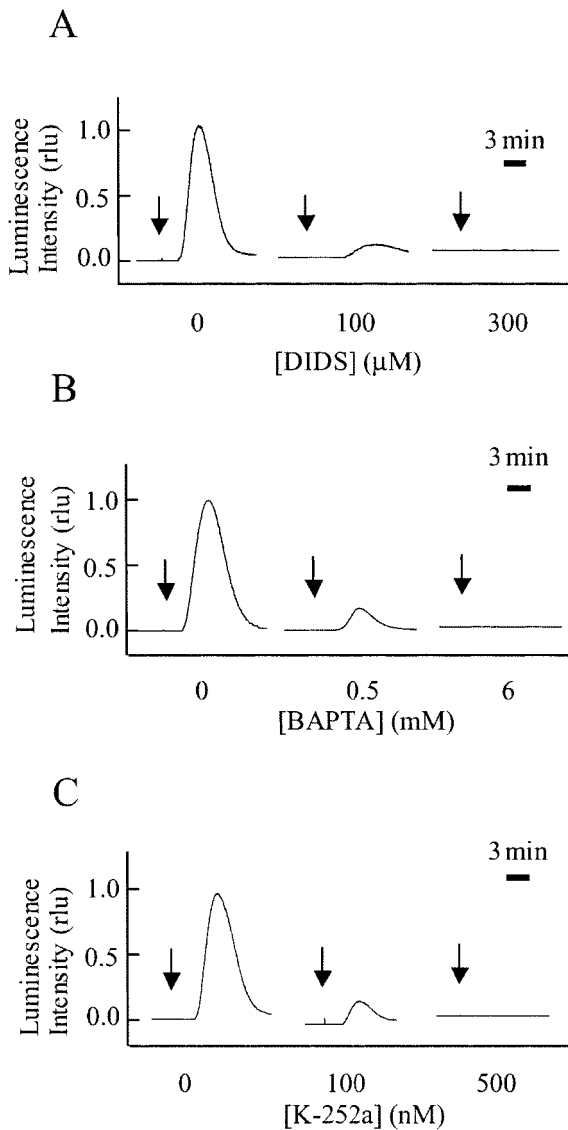

**Fig. 7**  $\text{H}_2\text{O}_2$  production is inhibited by DIDS, BAPTA and K-252a. Effect of DIDS (A), BAPTA (B) and K-252 (C) on cryptogein-induced  $\text{H}_2\text{O}_2$  production (relative luminescence) in apoaequorin-expressing BY-2 cells. Each inhibitor was applied 15 min before the application of cryptogein (arrows). The maximum luminescence value of the control cells was expressed as 1.0. Data are from one representative experiment of four.

protein phosphorylation regulates the activation of  $\text{Ca}^{2+}$ - and  $\text{Cl}^-$ -permeable ion channels.

#### *The initial increase in $[\text{Ca}^{2+}]_{\text{cyt}}$ is independent of $\text{}^{\bullet}\text{O}_2^-$ and $\text{H}_2\text{O}_2$*

To examine the relationship between the elicitor-induced ROS production and  $[\text{Ca}^{2+}]_{\text{cyt}}$  responses, we examined the effect of diphenylene iodonium (DPI), an inhibitor of mammalian and plant NADPH oxidases (Sagi and Fluhr 2001). Even though 2–5  $\mu\text{M}$  DPI was sufficient to completely inhibit  $\text{}^{\bullet}\text{O}_2^-$  and  $\text{H}_2\text{O}_2$  production (Fig. 6A, B), 15  $\mu\text{M}$  DPI failed to inhibit

the cryptogein-induced increase in  $[\text{Ca}^{2+}]_{\text{cyt}}$  (Fig. 6C). The second part of the  $[\text{Ca}^{2+}]_{\text{cyt}}$  response appeared to be rather enhanced by DPI. DPI did not show any effect on cryptogein-induced  $[\text{Ca}^{2+}]_{\text{cyt}}$  changes, suggesting that this inhibitor does not show toxic effect at least during measuring time (30 min). Furthermore, Evans blue assay showed that 15  $\mu\text{M}$  DPI did not affect cell viability at least for 1 h after application (data not shown). These results indicate that  $\text{}^{\bullet}\text{O}_2^-$  and  $\text{H}_2\text{O}_2$  do not directly participate in the elicitor-induced  $[\text{Ca}^{2+}]_{\text{cyt}}$  transients.

#### *ROS production requires protein phosphorylation and transmembrane ion fluxes*

DIDS, BAPTA and K-252a independently inhibited  $\text{H}_2\text{O}_2$  production, suggesting that the production of  $\text{H}_2\text{O}_2$  depends upon an efflux of anions,  $\text{Ca}^{2+}$  influx and protein phosphorylation (Fig. 7). Since these inhibitors themselves affected MCLA chemiluminescence, it was impossible to analyze effects of these inhibitors on  $\text{}^{\bullet}\text{O}_2^-$  production. In conclusion, the elicitor-induced ROS production occurs downstream of the ion fluxes and protein phosphorylation.

## Discussion

Though ion fluxes and ROS production induced by pathogenic signals and elicitors are suggested to be important for activation of defense responses, their molecular mechanisms were largely unknown. In the present study, we have simultaneously monitored cryptogein-induced various initial responses including fluxes of  $\text{Ca}^{2+}$ ,  $\text{H}^+$  and  $\text{Cl}^-$  as well as ROS production to elucidate their molecular mechanisms and interrelationships.

#### *Culture conditions affect $[\text{Ca}^{2+}]_{\text{cyt}}$ responses*

Changes in  $[\text{Ca}^{2+}]_{\text{cyt}}$  were greatly affected by culture conditions, especially nutrition and degree of aeration (Fig. 1). Replacement of the extracellular growth medium by the buffer solution caused 4-fold increase of the elicitor-induced  $[\text{Ca}^{2+}]_{\text{cyt}}$  change (Fig. 1B), which might be due to changes in intracellular  $\text{Ca}^{2+}$  homeostasis. ATP synthesis in the cells suspended in the buffer without sucrose or any other carbon source is expected to be low. A low ATP level would in turn lower the activities of  $\text{Ca}^{2+}$ -ATPase,  $\text{H}^+$ -ATPase and subsequently  $\text{Ca}^{2+}/\text{H}^+$  antiporters all of which are important to keep  $[\text{Ca}^{2+}]_{\text{cyt}}$  low (Sanders et al. 2002). In fact, treatment of the cells with an inhibitor for  $\text{Ca}^{2+}$ -ATPase, 2,5-di-(*t*-butyl)-1,4-hydroquinone (BHQ), enhanced the cryptogein-induced  $[\text{Ca}^{2+}]_{\text{cyt}}$  rise (data not shown).

Plant cells are generally sensitive to oxygen. Oxygen supply greatly affected cytoplasmic pH and plasma membrane potential. Sufficient aeration is crucial for noninvasive in vivo measurements of ion fluxes under physiological conditions (Kuchitsu et al. 1997, Kikuyama et al. 1997). When the aequorin luminescence was monitored without shaking the cell suspension, the  $[\text{Ca}^{2+}]_{\text{cyt}}$  changes were much smaller than those were measured with shaking (Fig. 2C, D), suggesting that aera-

tion (oxygen supply to the cells) could also be an indispensable factor for *in vivo* measurement of  $[Ca^{2+}]_{cyt}$  under physiological conditions. These results strongly indicate the importance of careful examination of experimental conditions for  $[Ca^{2+}]_{cyt}$  measurements. Furthermore, these results also suggest that interpretation of previously reported  $[Ca^{2+}]_{cyt}$  changes should be reconsidered according to the experimental conditions.

#### Temporal pattern of cryptogein-induced $[Ca^{2+}]_{cyt}$ rise

Noninvasive *in vivo* monitoring of  $[Ca^{2+}]_{cyt}$  revealed that the elicitor triggered two transient peaks in  $[Ca^{2+}]_{cyt}$  in the normal growth medium with constant aeration. Recently, Lecourieux et al. (2002) reported cryptogein-induced  $[Ca^{2+}]_{cyt}$  changes in cell suspensions of *Nicotiana plumbaginifolia*. They showed transient increase in  $[Ca^{2+}]_{cyt}$  peaked at 5 min after cryptogein application, followed by a sustained  $[Ca^{2+}]_{cyt}$  increase, which peaked at 30 min and failed to return to the baseline even after 2.5 h after elicitation. This temporal pattern was different from our observation with tobacco BY-2 cells in which no sustained increase of  $[Ca^{2+}]_{cyt}$  was observed and  $[Ca^{2+}]_{cyt}$  rather decreased to the basal levels (Fig. 1A).

These different signatures of  $Ca^{2+}$  response patterns could be explained in part by differences in the conditions for  $[Ca^{2+}]_{cyt}$  measurements. Lecourieux et al. (2002) incubated the cells with the suspension buffer similar to that used in the experiments shown in Fig. 1B and 1D, at least for 6 h prior to monitoring luminescence with a luminometer not equipped with shaking apparatus. When the cellular chemiluminescence was monitored without shaking after incubation of the cells in the buffer solution, which mimicked the experimental conditions used by Lecourieux et al. (2002), the  $[Ca^{2+}]_{cyt}$  signature (Fig. 1D; rapid and transient increase followed by prolonged rise) also resembled the pattern reported with *Nicotiana plumbaginifolia*. We decided to monitor  $[Ca^{2+}]_{cyt}$  in the normal growth medium with shaking, which mimicked the regular growth conditions, to further characterize the physiological events underlying the elicitor-induced  $[Ca^{2+}]_{cyt}$  transient peaks.

#### The two peaks in $[Ca^{2+}]_{cyt}$ are due to extracellular $Ca^{2+}$ influx and $IP_3$ -mediated release of $Ca^{2+}$ from intracellular stores

Two inhibitors for phospholipase C, neomycin and U73122, are reported to abolish  $IP_3$ -mediated  $Ca^{2+}$  release in mammalian and plant cells (Franklin-Tong et al. 1996, Takahashi et al. 2001). In the present study, these inhibitors predominantly inhibited the second peak of the cryptogein-induced  $[Ca^{2+}]_{cyt}$  transients (Fig. 3B, C). Since the cryptogein-induced  $[Ca^{2+}]_{cyt}$  response requires entry of extracellular  $Ca^{2+}$  (Fig. 3A), the first peak of the response is likely due to an influx of extracellular  $Ca^{2+}$ , whereas the second peak is due to a release of  $Ca^{2+}$  into the cytoplasm from intracellular stores through  $IP_3$ -dependent signaling pathway. Phospholipase C is also activated by  $Ca^{2+}$  in plants as well as in animals (Miyakawa et al. 2001, Zhang et al. 2002). The  $Ca^{2+}$  influx during the first peak of the response may participate in the activation of phospho-

pase C. Interestingly, oligosaccharide elicitors such as  $\beta$ -glucan, chitoheptaose and oligogalacturonides induce similar  $[Ca^{2+}]_{cyt}$  transient peaks (Mithöfer et al. 1999, Lecourieux et al. 2002), suggesting that signals from different kinds of elicitors are mediated by similar  $Ca^{2+}$  signaling pathways.

#### Cryptogein-induced ion channel cascade

An efflux of anions is suggested to be essential for the induction of defense responses and hypersensitive cell death (Ebel et al. 1995, Wendehenne et al. 2002). To clarify the relationship between anion efflux and changes in  $[Ca^{2+}]_{cyt}$ , we analyzed the effects of anion channel inhibitors on the induction of  $[Ca^{2+}]_{cyt}$  responses by cryptogein. We found that DIDS specifically inhibited the  $[Ca^{2+}]_{cyt}$  transients as well as  $Cl^-$  efflux in a dose dependent manner (Fig. 4B, 5A), suggesting important roles of anion efflux in induction of the  $[Ca^{2+}]_{cyt}$  responses.  $[Ca^{2+}]_{cyt}$  changes induced by other elicitors are shown to be inhibited by anthracene-9-carboxylic acid, and NPPB (Blume et al. 2000, Mithöfer et al. 2001) and by niflumate (Cessna and Low 2001). Although these inhibitors showed cytotoxicity in tobacco BY-2 cells, these observations indicate that the anion efflux is important for  $[Ca^{2+}]_{cyt}$  mobilization induced by various elicitors.

The  $Cl^-$  efflux was also inhibited by BAPTA and K-252a (Fig. 5B, C), suggesting that the cryptogein-induced  $Cl^-$  efflux requires both extracellular  $Ca^{2+}$  and protein phosphorylation. DIDS did not inhibit the  $[Ca^{2+}]_{cyt}$  responses completely, even at concentrations high enough to cause cytotoxicity. This implies that at least part of the  $Ca^{2+}$  influx is independent of the  $Cl^-$  efflux. Since the  $Cl^-$  efflux requires  $Ca^{2+}$  entry (Fig. 5B), the  $Cl^-$  efflux-independent  $Ca^{2+}$  influx might be responsible for initiating the  $Cl^-$  efflux. Indeed, the initial  $Ca^{2+}$  influx (at  $64 \pm 4$  s ( $n = 15$ )) occurred before the  $Cl^-$  efflux (at  $120 \pm 6$  s, ( $n = 9$ )) (Fig. 1A, 2A). Therefore, we surmise that cryptogein-induced rapid  $Ca^{2+}$  influx activates a  $Cl^-$  efflux, and that these two ion fluxes together induce a further influx of  $Ca^{2+}$ .

$Cl^-$  efflux might induce membrane depolarization in cryptogein signaling. In stomatal guard cells, an anion channel plays a major role in ABA-induced plasma-membrane depolarization and stomatal closing (Ward et al. 1995). ABA-regulated plasma membrane  $Ca^{2+}$  influx and  $Cl^-$  efflux are regulated by protein phosphatases and kinases (Pei et al. 1997, Allen et al. 1999, Li et al. 2000, Kwak et al. 2002). Molecular functional analyses for the role of plasma membrane  $Ca^{2+}$  influx and  $Cl^-$  efflux in membrane depolarization and signal transduction would be an important future research subject. Recently, the gene encoding a putative voltage-dependent  $Ca^{2+}$ -permeable channel, *AtTPC1*, was cloned from *Arabidopsis* (Furuichi et al. 2001). *AtTPC1* is ubiquitously expressed in the whole plant. Such voltage-dependent  $Ca^{2+}$ -permeable channel may be involved in the elicitor-induced  $Ca^{2+}$  influx.

Cryptogein also triggered complexed pattern of  $H^+$  flux (Fig. 2A). Characteristic for the first peak is similar to the elicitor-induced transient cytoplasmic acidification and extracellular

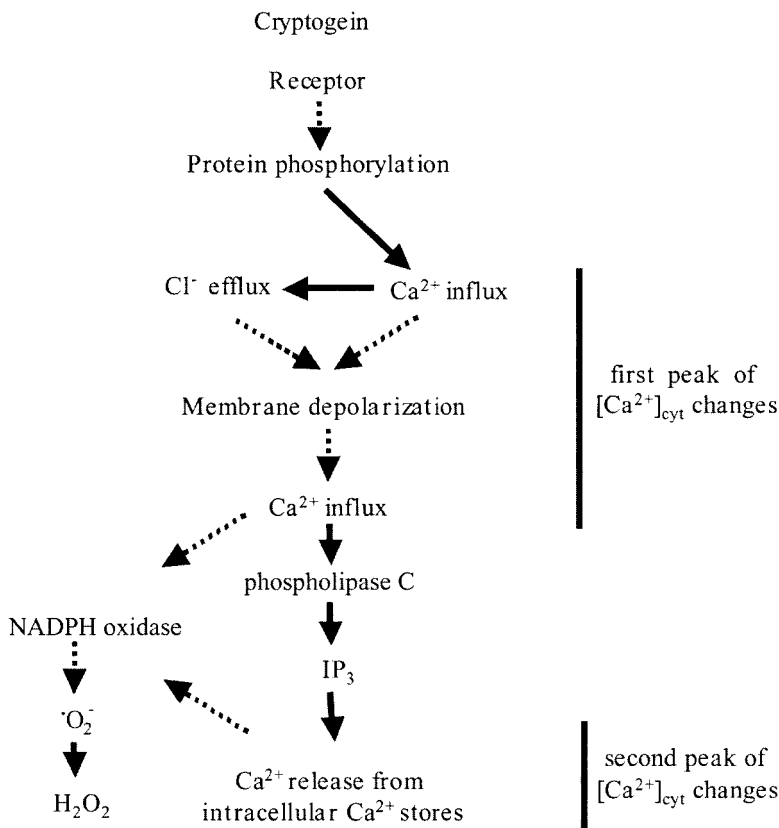

**Fig. 8** A model of cryptogein-induced ion fluxes and ROS production. The model was based on the effects of inhibitors (K-252a, BAPTA, U-73122, neomycin, DIDS, and DPI) and response lag times. Unbroken and broken arrows indicate established and hypothetical links, respectively.

alkalinization (Kuchitsu et al. 1997) and may be due to a plasma membrane H<sup>+</sup> influx. Though pathogenic signal-induced external alkalization is observed in many experimental systems, its molecular mechanism is still unknown. The pH change started after the initiation of the Ca<sup>2+</sup> influx and was inhibited by BAPTA, DIDS and K-252a (Kadota et al. unpublished results), suggesting that the pH changes are downstream events of the initial Ca<sup>2+</sup> influx, Cl<sup>-</sup> efflux and protein phosphorylation. Plasma membrane H<sup>+</sup> influx may be regulated by Ca<sup>2+</sup>, membrane depolarization and protein phosphorylation. The present simultaneous measurements and pharmacological analyses of various ion fluxes revealed that cryptogein induces a series of plasma membrane ion fluxes mediated by various ion channels (“ion channel cascade”) summarized in Fig. 8.

#### *NADPH oxidase-dependent ROS production occurs downstream of the [Ca<sup>2+</sup>]<sub>cyt</sub> transients*

Several recent reports have suggested that H<sub>2</sub>O<sub>2</sub> triggers the changes in [Ca<sup>2+</sup>]<sub>cyt</sub> (Price et al. 1994, Levine et al. 1996, Takahashi et al. 1998, Kawano and Muto 2000, Pei et al. 2000). It has also been suggested that H<sub>2</sub>O<sub>2</sub> produced upon elicitation activates [Ca<sup>2+</sup>]<sub>cyt</sub> changes. Lecourieux et al. (2002) showed that 10 μM DPI, an inhibitor of NADPH oxidase, partially inhibited [Ca<sup>2+</sup>]<sub>cyt</sub> changes. Yeast elicitors and chitosan stimulate an NADPH-dependent, hyperpolarization-activated Ca<sup>2+</sup> current (I<sub>Ca</sub>) in *Arabidopsis* guard cells. Since this current

is also activated by ROS (Pei et al. 2000), elicitor-induced ROS may activate I<sub>Ca</sub> (Klüsener et al. 2002).

However, the present results suggest that ROS do not directly participate in the cryptogein-induced [Ca<sup>2+</sup>]<sub>cyt</sub> transient peaks and that the ROS production occurs downstream of the initial [Ca<sup>2+</sup>]<sub>cyt</sub> responses. This notion is supported by the following observations. Firstly, cryptogein-induced [Ca<sup>2+</sup>]<sub>cyt</sub> responses occurred prior to the production of ROS (Fig. 2B, C). The changes in [Ca<sup>2+</sup>]<sub>cyt</sub> occurred 64±4 s (n = 15) after cryptogein application, while ·O<sub>2</sub><sup>-</sup> and H<sub>2</sub>O<sub>2</sub> production started at 124±6 s (n = 7) and 268±14 s (n = 7), respectively. Secondly, 2–5 μM DPI inhibited ROS production completely (Fig. 6A, B), but did not affect the initial [Ca<sup>2+</sup>]<sub>cyt</sub> increase triggered by cryptogein (Fig. 6C). Finally, cryptogein-induced H<sub>2</sub>O<sub>2</sub> production was inhibited by DIDS, BAPTA and K-252a (Fig. 7), suggesting that the production of ROS requires Ca<sup>2+</sup> influx, Cl<sup>-</sup> efflux and protein phosphorylation.

Overexpression of antisense RNA for NtrbohD, a homologue of the flavocytochrome of the neutrophil NADPH oxidase, resulted in repression of cryptogein-induced ROS production but did not affect the extracellular alkalization (Simon-Plas et al. 2002). Considering that extracellular alkalization requires an increase in [Ca<sup>2+</sup>]<sub>cyt</sub> (Tavernier et al. 1995, Kadota et al. unpublished results), cryptogein-induced initial [Ca<sup>2+</sup>]<sub>cyt</sub> increase may be intact even when the elicitor-induced ROS production is repressed by the antisense RNA. These



results are consistent with the present finding that cryptogein-induced ROS production is not directly involved in the  $[Ca^{2+}]_{cyt}$  transients, and instead is triggered downstream of the fluxes of  $Ca^{2+}$  and  $Cl^-$  as well as protein phosphorylation.

#### Concluding remarks

Based on the effects of various pharmacological inhibitors and the response lag times observed in the present study, we hypothesize that cryptogein-induced signaling pathway comprises the following processes summarized in Fig. 8. Cryptogein is recognized by plasma membrane-bound receptors (Wendehenne et al. 1995). Protein phosphorylation then induces a rapid  $Ca^{2+}$  influx that activates an efflux of  $Cl^-$ . These ion fluxes could induce membrane depolarization, which would cause a further influx of  $Ca^{2+}$  via voltage-dependent  $Ca^{2+}$  channels (Ward et al. 1995). The  $Ca^{2+}$  influx could activate phospholipase C, which in turn would cause  $Ca^{2+}$  to be released from intracellular  $Ca^{2+}$  stores. We propose that these series of ion fluxes ("ion channel cascade") play indispensable roles in defense signaling and regulation of downstream events including oxidative burst. These ion channels may be present as a complex together with other signaling components such as receptors and protein kinases/phosphatases (Yamazaki et al. 2003). Future molecular genetic identification and functional analyses of these ion channels should be one of the most important targets to understand the molecular mechanisms for recognition of pathogens and to manipulate defense signaling to improve disease resistance.

## Materials and Methods

#### Plant material

Tobacco BY-2 (*Nicotiana tabacum* L. cv. Bright Yellow 2) cell suspensions and transgenic tobacco cell cultures that express apoaequorin protein specifically in the cytosol (Takahashi et al. 1997) were maintained by weekly dilution (1/100 and 1/50, respectively) of cells with fresh Linsmaier and Skoog (LS) medium modified according Nagata et al. (1992). Cells were maintained at 28°C with aeration (shaking at 100 rpm) in the dark.

#### Expression and purification of cryptogein

*Pichia pastoris* (strain GS115) bearing the plasmid pLEP3 was used for cryptogein production. Cryptogein was expressed according to O'Donohue et al. (1996) and was dissolved in distilled water. Cryptogein concentration was determined using UV spectroscopy employing extinction coefficients of  $8,306 M^{-1} cm^{-1}$  at 277 nm (O'Donohue et al. 1995).

#### Chemicals

BAPTA, DIDS and 3-(4,5-dimethyl-2-thiazolyl)-2,5-diphenyl-2H tetrazolium bromide (MTT) were obtained from Dojindo Laboratories (Kumamoto, Japan). U73122 was purchased from Calbiochem (La Jolla, CA, U.S.A.). Coelenterazine and MCLA were obtained from Molecular Probes (Eugene, OR, U.S.A.). K-252a, neomycin and luminol were purchased from Wako Pure Chemical (Osaka, Japan).

#### Measurement of changes in $[Ca^{2+}]_{cyt}$

The apoaequorin-expressing BY-2 cell suspension (3 d after subculture) was incubated with 1  $\mu M$  coelenterazine for at least 6 h at 28°C. Cell suspension (250  $\mu l$ ) was transferred to the culture tube (1.1 cm in diameter), and set in a luminometer (Lumicounter 2500, Microtech Niton, Chiba, Japan). In this luminometer, the culture tube rotates 17 revolutions every 3 s in the clockwise and counterclockwise in turn, and agitate the cells.  $Ca^{2+}$ -dependent aequorin luminescence was measured after incubation for 15 min to stabilize the cells.

#### Measurement of pH and $[Cl^-]$

Aliquots of cells (30 g fresh weight) that had been subcultured for 3 d were transferred to 30 ml of fresh culture medium that lacked  $KH_2PO_4$  and  $CaCl_2$ , but contained  $CaSO_4$ . The cells were incubated in open 100-ml vials with shaking on a gyratory shaker at 160 rpm. The pH and  $[Cl^-]$  of the culture medium were measured simultaneously with a combination electrode that was sensitive to  $H^+$  and  $Cl^-$  (Models 9620 10-D & 8002, Horiba, Kyoto, Japan). Analog signals were converted to a digital signal with an A-D converter (power Lab/L800, AD Instruments, Castle Hill, Australia) and the data were analyzed with appropriate software (Chart v3.6.8, AD Instruments).

#### Measurement of ROS ( $\cdot O_2^-$ and $H_2O_2$ )

The apoaequorin-expressing BY-2 cell suspension (3 d after subculture) was used for measurement of  $\cdot O_2^-$  and  $H_2O_2$ . After treatment the cells in normal growth medium with 20  $\mu M$  MCLA,  $\cdot O_2^-$ -dependent luminescence was measured with a luminometer (Lumicounter 2500, Microtech Niton, Chiba, Japan) as the same condition to the measurement of  $[Ca^{2+}]_{cyt}$ .

To monitor  $H_2O_2$ , cells were washed and resuspended in a 5 mM HEPES buffer (pH 7.0) containing 175 mM mannitol, 3 mM  $CaCl_2$ , and 0.5 mM  $K_2SO_4$ . After a 3 h equilibration period on a gyratory shaker (100 rpm, 28°C), 0.5 mM luminol and 5 mM K-phosphate buffer (pH 7.0) was added. Fifteen minutes after the luminol application,  $H_2O_2$ -dependent chemiluminescence was monitored with a luminometer (Lumicounter 2500, Microtech Niton, Chiba, Japan) under the same condition as the measurement of  $[Ca^{2+}]_{cyt}$ .

## Acknowledgments

The authors are grateful to Dr. Munehiro Kikuyama for technical support for the real time measurement of ion fluxes. We thank Dr. Toyoki Amano for valuable suggestions and Prof. Jean-Claude Pernollet for providing us with cryptogein. This work was supported in part by a grant from the Research for the Future Program of the Japan Society for the Promotion of Science and a grant for scientific research in priority areas from the Ministry of Education, Science, Culture, Sports and Technology, Japan. This work was supported in part by a Grant-in-Aid for the Research for the Future Program and Scientific Research (B) (no. 14340251) from the Japan Society for the Promotion of Science to K. K. and S. M., respectively, and Grants-in-Aid for Scientific Research in Priority Areas from the Ministry of Education, Science, Culture, Sports, and Technology, Japan to K. K. (No. 13039015) and S. M. (No. 13039008).

## References

- Allen, G.J., Kuchitsu, K., Chu, S.P., Murata, Y. and Schroeder, J.I. (1999) Arabidopsis *abi1-1* and *abi2-1* phosphatase mutations reduce abscisic acid-induced cytoplasmic calcium rises in guard cells. *Plant Cell* 11: 1785–1798.
- Binet, M., Humbert, C., Lecourieux, D., Vantard, M. and Pugin, A. (2001) Disruption of microtubular cytoskeleton induced by cryptogein, an elicitor of hypersensitive response in tobacco cells. *Plant Physiol.* 125: 564–572.

- Blume, B., Nürnberger, T., Nass, N. and Scheel, D. (2000) Receptor-mediated increase in cytoplasmic free calcium required for activation of pathogen defense in parsley. *Plant Cell* 12: 1425–1440.
- Campling, B.G., Pym, J., Galbraith, P.R. and Cole, S.P. (1988) Use of the MTT assay for rapid determination of chemosensitivity of human leukemic blast cells. *Leuk Res.* 12: 823–831.
- Cessna, S.G. and Low, P.S. (2001) Activation of the oxidative burst in aequorin-transformed *Nicotiana tabacum* cells is mediated by protein kinase- and anion channel-dependent release of  $\text{Ca}^{2+}$  from internal stores. *Planta* 214: 126–134.
- Chandra, S., Stennis, M. and Low, P.S. (1997) Measurement of  $\text{Ca}^{2+}$  fluxes during elicitation of the oxidative burst in aequorin-transformed tobacco cells. *J. Biol. Chem.* 272: 28274–28280.
- Ebel, J., Bhagwat, A.A., Cosio, E.G., Feger, M., Kissel, U., Mithöfer, A. and Waldmüller, T. (1995) Elicitor-binding proteins and signal transduction in the activation of a phytoalexin defense response. *Can. J. Bot.* 73: 506–510.
- Franklin-Tong, V.E., Drobak, B.K., Allan, A.C., Watkins, P.A.C. and Trewavas, A.J. (1996) Growth of pollen tubes of *Papaver rhoeas* is regulated by a slow moving calcium wave propagated by inositol 1, 4, 5 trisphosphate. *Plant Cell* 8: 1305–1321.
- Furuichi, T., Cunningham, K.W. and Muto, S. (2001) A putative two pore channel AtTPC1 mediates  $\text{Ca}^{2+}$  flux in Arabidopsis leaf cells. *Plant Cell Physiol.* 42: 900–905.
- Heath, M.C. (2000) Hypersensitive response-related death. *Plant Mol. Biol.* 44: 321–334.
- Jabs, T., Tschöpe, M., Colling, C., Hahlbrock, K. and Scheel, D. (1997) Elicitor-stimulated ion fluxes and  $\text{O}_2^-$  from the oxidative burst are essential components in triggering defense gene activation and phytoalexin synthesis in parsley. *Proc. Natl Acad. Sci. USA* 94: 4800–4805.
- Jones, A.M. and Dangl, J.L. (1996) Logjam at te Styx: programmed cell death in plants. *Trends Plant Sci.* 1: 114–119.
- Kawano, T. and Muto, S. (2000) Mechanism of peroxidase actions for salicylic acid-induced generation of active oxygen species and an increase in cytosolic calcium in tobacco cell suspension culture. *J. Exp. Bot.* 51: 685–693.
- Kikuyama, M., Kuchitsu, K., Shibuya, N. (1997) Membrane depolarization induced by *N*-acetylchitoooligosaccharide elicitor in suspension-cultured rice cells. *Plant Cell Physiol.* 38: 902–909.
- Klüsener, B., Young, J.J., Murata, Y., Allen, G.J., Mori, I.C., Hugouvieux, V. and Schroeder, J.I. (2002) Convergence of calcium signaling pathways of pathogenic elicitors and abscisic acid in Arabidopsis guard cells. *Plant Physiol.* 130: 2152–2163.
- Kuchitsu, K., Kikuyama, M. and Shibuya, N. (1993) *N*-Acetylchitoooligosaccharides, biotic elicitor for phytoalexin production, induce transient membrane depolarization in suspension-cultured rice cells. *Protoplasma* 174: 79–81.
- Kuchitsu, K., Kosaka, H., Shiga, T. and Shibuya, N. (1995) EPR evidence for generation of hydroxyl radical triggered by *N*-acetylchitoooligosaccharide elicitor and a protein phosphatase inhibitor in suspension-cultured rice cells. *Protoplasma* 188: 138–142.
- Kuchitsu, K., Yazaki, Y., Sakano, K. and Shibuya, N. (1997) Transient cytoplasmic pH change and ion fluxes through the plasma membrane in suspension-cultured rice cells triggered by *N*-acetylchitoooligosaccharide elicitor. *Plant Cell Physiol.* 38: 1012–1018.
- Kwak, J.M., Moon, J.-H., Murata, Y., Kuchitsu, K., Leonhardt, N., DeLong, A. and Schroeder, J.I. (2002) Disruption of a guard cell-expressed protein phosphatase 2A regulatory subunit, *RCN1*, confers abscisic acid insensitivity in Arabidopsis. *Plant Cell* 14: 2849–2861.
- Kwak, J.M., Mori, I.C., Pei, Z.M., Leonhardt, N., Torres, M.A., Dangl, J.L., Bloom, R.E., Bodde, S., Jones, J.D. and Schroeder, J.I. (2003) NADPH oxidase *AtRbohD* and *AtRbohF* genes function in ROS-dependent ABA signaling in Arabidopsis. *EMBO J.* 22: 2623–2633.
- Lecourieux, D., Mazars, C., Pauly, N., Ranjeva, R. and Pugin, A. (2002) Analysis and effects of cytosolic free calcium increases in response to elicitors in *Nicotiana plumbaginifolia* cells. *Plant Cell* 14: 2627–2641.
- Levine, A., Tenhaken, R., Dixon, R. and Lamb, C. (1994)  $\text{H}_2\text{O}_2$  from the oxidative burst orchestrates the plant hypersensitive disease resistance response. *Cell* 79: 583–593.
- Levine, A., Pennell, R.I., Alvarez, M.E., Palmer, R. and Lamb, C. (1996) Calcium-mediated apoptosis in a plant hypersensitive disease resistance response. *Curr. Biol.* 6: 427–437.
- Li, J., Wang, X.Q., Watson, M.B. and Assmann, S.M. (2000) Regulation of abscisic acid-induced stomatal closure and anion channels by guard cell AAPK kinase. *Science* 287: 300–303.
- Mithöfer, A., Ebel, J., Bhagwat, A.A., Boller, T. and Neuhaus-Url, G. (1999) Transgenic aequorin monitors cytosolic calcium transients in soybean cells challenged with  $\beta$ -glucan or chitin elicitors. *Planta* 207: 566–574.
- Mithöfer, A., Fliegmann, J., Daxberger, A., Ebel, C., Neuhaus-Url, G., Bhagwat, A.A., Keister, D.L. and Ebel, J. (2001) Induction of  $\text{H}_2\text{O}_2$  synthesis by  $\beta$ -glucan elicitors in soybean is independent of cytosolic calcium transients. *FEBS Lett.* 508: 191–195.
- Miyakawa, T., Mizushima, A., Hirose, K., Yamazawa, T., Bezprozvanny, I., Kurosaki, T. and Iino, M. (2001)  $\text{Ca}^{2+}$ -sensor region of  $\text{IP}_3$  receptor controls intracellular  $\text{Ca}^{2+}$  signaling. *EMBO J.* 20: 1674–1680.
- Nagata, T., Nemoto, Y. and Hasezawa, S. (1992) Tobacco BY-2 cell line as the “Hela” cell in the cell biology of higher plants. *Int. Rev. Cytol.* 132: 1–30.
- O’Donohue, M.J., Boissy, G., Huet, J.C., Nespoulous, C., Brunie, S. and Pernellet, J.C. (1996) Overexpression in *Pichia pastoris* and crystallization of an elicitor protein secreted by the phytopathogenic fungus, *Phytophthora cryptogea*. *Protein Expr. Purif.* 8: 254–261.
- O’Donohue, M.J., Gousseau, H., Huet, J.C., Tepfer, D. and Pernellet, J.C. (1995) Chemical synthesis, expression and mutagenesis of a gene encoding beta-cryptogein, an elicitor produced by *Phytophthora cryptogea*. *Plant Mol. Biol.* 27: 577–586.
- Pei, Z.-M., Kuchitsu, K., Ward, J.M., Schwarz, M. and Schroeder, J.I. (1997) Differential abscisic acid regulation of guard cell slow anion channels in Arabidopsis wild-type and *abi1* and *abi2* mutants. *Plant Cell* 9: 409–423.
- Pei, Z.M., Murata, Y., Benning, G., Thomine, S., Klüsener, B., Allen, G.J., Grill, E. and Schroeder, J.I. (2000) Calcium channels activated by hydrogen peroxide mediate abscisic acid signalling in guard cells. *Nature* 406: 731–734.
- Price, A.H., Taylor, A., Ripley, S.J., Griffith, A., Trewavas, A.J. and Knight, M.R. (1994) Oxidative signals in tobacco increase cytosolic calcium. *Plant Cell* 6: 1301–1310.
- Pugin, A., Frachisse, J.M., Tavernier, E., Bligny, R., Gout, E., Douce, R. and Guern, J. (1997) Early events induced by the elicitor cryptogein in tobacco cells: Involvement of a plasma membrane NADPH oxidase and activation of glycolysis and the pentose phosphate pathway. *Plant Cell* 9: 2077–2091.
- Ricci, P., Bonnet, P., Huet, J.C., Sallantin, M., Beauvais-Cante, F., Bruneteau, M., Billard, V., Michel, G. and Pernellet, J.C. (1989) Structure and activity of proteins from pathogenic fungi *Phytophthora* eliciting necrosis and acquired resistance in tobacco. *Eur. J. Biochem.* 183: 555–563.
- Sagi, M. and Fluhr, R. (2001) Superoxide production by plant homologues of the gp91(phox) NADPH oxidase. Modulation of activity by calcium and by tobacco mosaic virus infection. *Plant Physiol.* 126: 1281–1290.
- Sanders, D., Pelloux, J., Brownlee, C. and Harper, J.F. (2002) Calcium at the crossroads of signaling. *Plant Cell* 14: S401–417.
- Shibuya, N., Kaku, H., Kuchitsu, K. and Malariak, M.J. (1993) Identification of a novel high-affinity binding site for *N*-acetylchitoooligosaccharide elicitor in the membrane fraction from suspension-cultured rice cells. *FEBS Lett.* 329: 75–78.
- Simon-Plas, F., Elmayer, T. and Blein, J.P. (2002) The plasma membrane oxidase *NtrbohD* is responsible for AOS production in elicited tobacco cells. *Plant J.* 31: 137–147.
- Takahashi, K., Isobe, M., Knight, M.R., Trewavas, A.J. and Muto, S. (1997) Hypoosmotic shock induces increases in cytosolic  $\text{Ca}^{2+}$  in tobacco suspension-culture cells. *Plant Physiol.* 113: 587–594.
- Takahashi, K., Isobe, M. and Muto, S. (1998) Mastoparan induces an increase in cytosolic calcium ion concentration and subsequent activation of protein kinases in tobacco suspension culture cells. *Biochim. Biophys. Acta* 1401: 339–346.
- Takahashi, S., Katagiri, T., Hirayama, T., Yamaguchi-Shinozaki, K. and Shinozaki, K. (2001) Hyperosmotic stress induces a rapid and transient increase in inositol 1,4,5-trisphosphate independent of abscisic acid in Arabidopsis cell culture. *Plant Cell Physiol.* 42: 214–222.
- Tavernier, E., Wendeheime, D., Blein, J.P. and Pugin, A. (1995) Involvement of free calcium in action of cryptogein, a proteinaceous elicitor of hypersensitive reaction in tobacco cells. *Plant Physiol.* 109: 1025–1031.
- Turner, J.G. and Novacky, A. (1974) The quantitative relation between plant and bacterial cells involved in the hypersensitive reaction. *Phytopathology* 64: 885–890.

- Uehara, K., Maruyama, N., Huang, C.K. and Nakano, M. (1993) The first application of a chemiluminescence probe, 2-methyl-6-[*p*-methoxyphenyl]-3,7-dihydroimidazo[1,2-*a*]pyrazin-3-one (MCLA), for detecting O<sub>2</sub><sup>-</sup> production, in vitro, from Kupffer cells stimulated by phorbol myristate acetate. *FEBS Lett.* 335: 167–170.
- Ward, J.M., Pei, Z.M. and Schroeder, J.I. (1995) Roles of ion channels in initiation of signal transduction in higher plants. *Plant Cell* 7: 833–844.
- Wendehenne, D., Binet, M.N., Blein, J.P., Ricci, P. and Pugin, A. (1995) Evidence for specific, high-affinity binding sites for a proteinaceous elicitor in tobacco plasma membrane. *FEBS Lett.* 374: 203–207.
- Wendehenne, D., Lamotte, O., Frachisse, J.M., Barbier-Brygoo, H. and Pugin, A. (2002) Nitrate efflux is an essential component of the cryptogein signaling pathway leading to defense responses and hypersensitive cell death in tobacco. *Plant Cell* 14: 1937–1951.
- Yamazaki, D., Yoshida, S., Asami, T and Kuchitsu, K. (2003) Visualization of abscisic acid-perception sites on the plasma membrane of stomatal guard cells. *Plant J.* 35: 129–139.
- Zhang, X.G., Cote, G.G. and Crain, R.C. (2002) Involvement of phosphoinositide turnover in tracheary element differentiation in *Zinnia elegans* L. cells. *Planta* 215: 312–318.

(Received August 20, 2003; Accepted December 6, 2003)
